# Supplementary material for: BCMA-BBZ-OX40 CAR-T Therapy Using an Instant Manufacturing Platform in Multiple Myeloma
Source: PubMed Central journal article supplement — J Immunother Cancer. 2024 Sep 23;12(9):e009476. doi: 10.1136/jitc-2024-009476 (PMC11418555; doi:10.1136/jitc-2024-009476), 2024-09-23
Supplement: jitc-12-9-s002.pdf [file jitc-12-9-s002.pdf]

**BCMA-BBZ-OX40 CAR-T Therapy Using an Instant Manufacturing  
Platform or Traditional Production Process  
in Relapsed/Refractory Multiple Myeloma  
Supplementary material**

Principle investigator: Hui Liu

Department of Hematology, Beijing Hospital,  
National Center of Gerontology, Institute of Geriatric Medicine,  
Chinese Academy of Medical Sciences, Beijing, China

## Table of Contents

|     |                                                                                                                              |   |
|-----|------------------------------------------------------------------------------------------------------------------------------|---|
| 1   | Supplemental Figures .....                                                                                                   | 3 |
| 1.1 | Figure legends.....                                                                                                          | 3 |
|     | Supplemental Figure 1. Antigen-independent OX40 enhanced CAR-T-cell function in vitro. ....                                  | 3 |
|     | Supplemental Figure 2. Antigen-independent OX40 enhanced CAR-T-cell function in vivo. ....                                   | 3 |
|     | Supplemental Figure 3. Reduction of the manufacturing time improved CAR-T-cell function in vitro. ....                       | 3 |
| 1.2 | Supplemental Figure 1.....                                                                                                   | 5 |
| 1.3 | Supplemental Figure 2.....                                                                                                   | 6 |
| 1.4 | Supplemental Figure 3.....                                                                                                   | 7 |
| 2   | Supplemental Tables .....                                                                                                    | 8 |
| 2.1 | Supplemental Table 1. Description of extramedullary disease.....                                                             | 8 |
| 2.2 | Supplemental Table 2. Baseline characteristics of patients and clinical response after BCMA-BBZ-OX40 CAR-T cell therapy..... | 9 |

## 1 Supplemental Figures

### 1.1 Figure legends.

#### **Supplemental Figure 1. Antigen-independent OX40 enhanced CAR-T-cell function in vitro.**

(A) Histogram of the expression of CAR and OX40 in T cells transduced with BCMA-BBZ-OX40 or BCMA-BBZ CAR constructs at different time points, data was collected from three donors; (B) In vitro cytotoxicity of T and BCMA CAR-T cells on H929 or U266 cells, bars indicate mean of three technical replicates with error bars indicating SD; (C) Representative quantification of PD-1 and LAG-3 on CAR-T cells after stimulation with U266 cells at E/T = 5/1 for four days; (D) Quantification of the expression of CD45RA and CD62L in CAR<sup>+</sup> T cells after stimulation with U266 cells at E/T = 5/1 for four days.

\*p < 0.05, \*\*\*p < 0.001, ns > 0.05 by unpaired t test.

#### **Supplemental Figure 2. Antigen-independent OX40 enhanced CAR-T-cell function in vivo.**

(A) Schematics of the in vivo experimental workflow used,  $2 \times 10^6$  CAR<sup>+</sup> T cells were injected into tumor-bearing mice; (B) representative bioluminescence imaging of the mouse model after CAR-T treatment; for all groups, n = 6; (C) Quantification showing the tumor burden as indicated by total radiance (p/s/cm<sup>2</sup>/sr); (D) CAR<sup>+</sup> T-cell number in peripheral blood (PB) after CAR-T-cell injection; (E) survival curve of NPG mice with different treatments.

ns, not significant by unpaired Mann-Whitney test. For Kaplan-Meier curves, Log rank (Mantel-Cox) test was performed.

#### **Supplemental Figure 3. Reduction of the manufacturing time improved CAR-T-cell function in vitro.**

(A) Cell viability during seven days of recovery; (B) Proliferation of InstanCART and TraditionCART cells during seven days of recovery; (C) Histogram showing the phenotype of CAR<sup>+</sup> InstanCART and TraditionCART cells on day 7 after recovery; (D) Schema of restimulation of H929-LAE tumor cells in vitro; after four serial stimulations, BCMA-BBZ-OX40 CAR-T cells were cocultured with H929-LAE tumor cells for the in vitro killing assay; (E) histogram showing the viability and proliferation of CAR<sup>+</sup> InstanCART and

TraditionCART cells after four serial stimulations (indicated by black arrows) with H929-LAE tumor cells; (F) histogram showing the phenotype of CAR<sup>+</sup> InstanCART and TraditionCART cells after four serial stimulations with H929-LAE tumor cells; (G) the cytotoxicity of engineered InstanCART or TraditionCART cells against U266 tumor cells in vitro after four serial stimulations; (H) Experimental design of in vitro chronic stimulation model in which CAR-T cells were stimulated with  $5 \times 10^4$  H929-LAE cells every three days. Red lines represent each round of restimulation with fresh H929-LAE target cells. On day 16 continuously stimulated CAR-T cells are analyzed by flow cytometry; (I) Total tumor cells remaining at the end of the stimulation; (J) CAR<sup>+</sup> T cells remaining at the end of the stimulation. CAR<sup>+</sup> T cells indicated T cells which expressed the CAR on the cell surface. CAR-T cells indicated the total T cell population with and without CAR expression. Bars indicate mean of three technical replicates with error bars indicating SD.

\* $p < 0.05$ , \*\*\* $p < 0.001$ , \*\*\*\* $p < 0.0001$  by one-way ANOVA for multiple comparisons.

**1.2 Supplemental Figure 1. Antigen-independent OX40 enhanced CAR-T-cell function in vitro.**

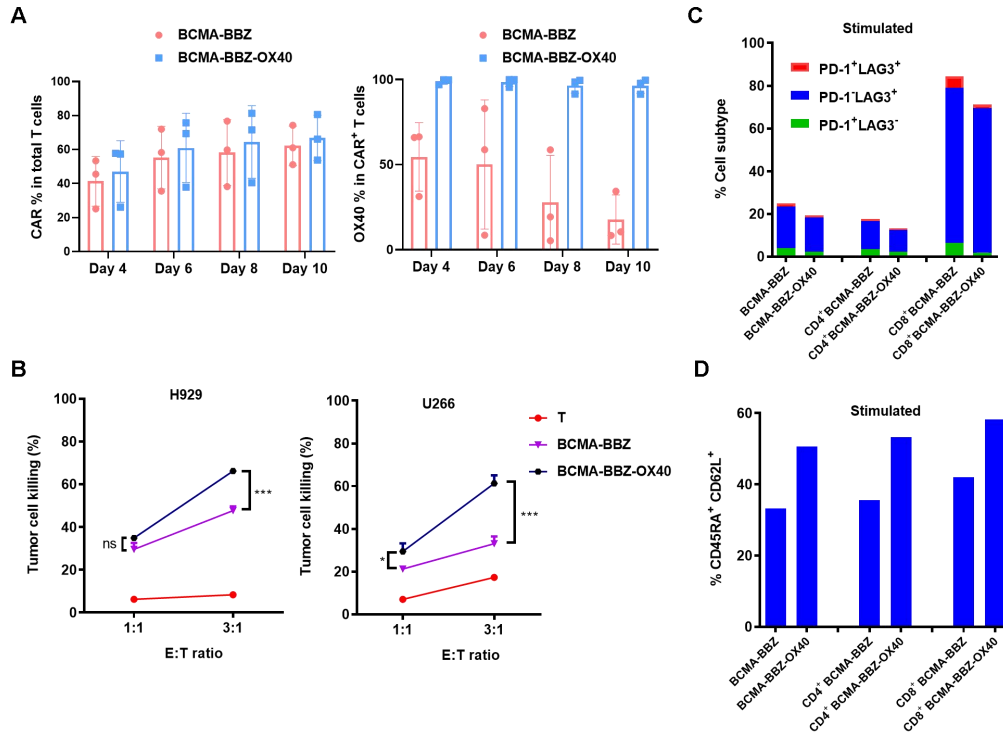

**1.3 Supplemental Figure 2. Antigen-independent OX40 enhanced CAR-T-cell function in vivo.**

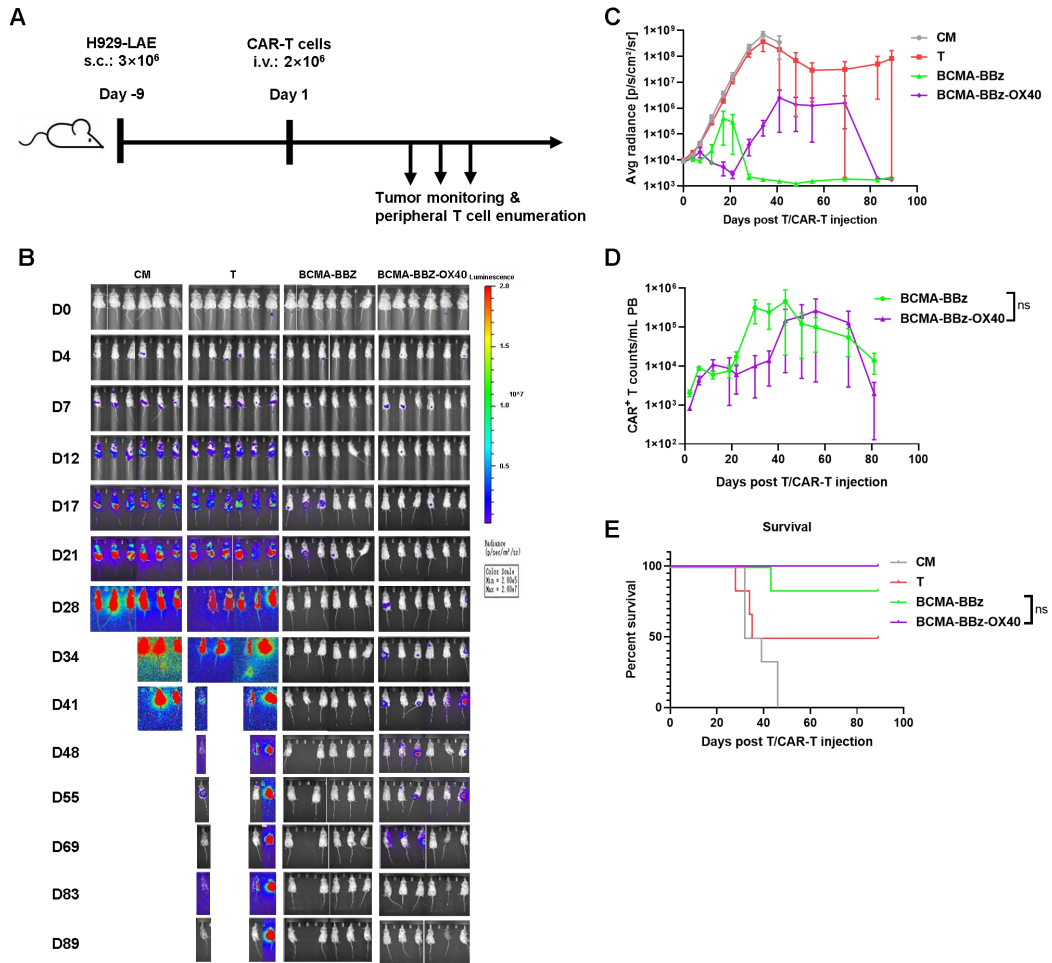

**1.4 Supplemental Figure 3. Reduction of the manufacturing time improved CAR-T-cell function in vitro.**

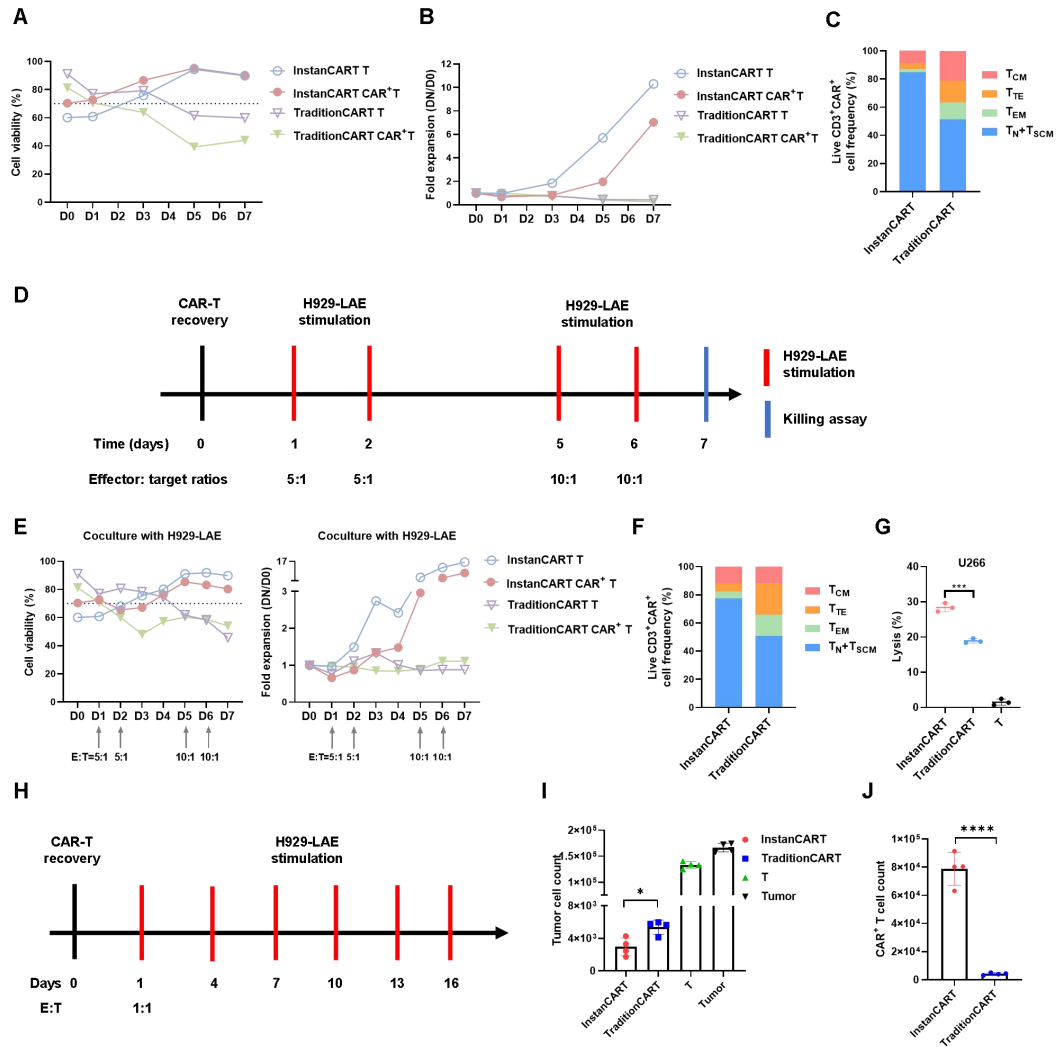

## 2 Supplemental Tables

### 2.1 Supplemental Table 1. Description of soft tissue plasmacytoma.

| Patient ID | Sites of soft tissue plasmacytoma                                                                                                                                                                                                                   |
|------------|-----------------------------------------------------------------------------------------------------------------------------------------------------------------------------------------------------------------------------------------------------|
| BJ00       | liver, spleen, multiple abdominal and subcutaneous nodules, cauda equina, the right parietal lobe region that was close to falx cerebri                                                                                                             |
| BJ01       | left supraclavicular fossa lymph node, masses on the left forehead, right lower back and left knee joint mass                                                                                                                                       |
| BJ03       | bone destruction of the left clavicle with soft tissue mass, multiple subcutaneous nodules in the chest and back                                                                                                                                    |
| BJ04       | pathological fracture of ribs with soft tissue mass, bilateral iliac soft tissue mass                                                                                                                                                               |
| BJ06       | skull bone destruction with soft tissue mass                                                                                                                                                                                                        |
| BJ08       | bone destruction with soft tissue mass in the left iliac crest                                                                                                                                                                                      |
| BJ11       | pancreas, liver, gallbladder, right kidney, right pleura and soft tissue mass at the right posterior tenth rib                                                                                                                                      |
| BJ13       | soft tissue lesions around some bones                                                                                                                                                                                                               |
| BJ14       | left lumbar mass, retroperitoneal para-aortic soft tissue, bilateral erector spinae, muscles around the pelvis, left sartorius, inguinal lymph nodes                                                                                                |
| BJ17       | a right orbital mass, thickening and enhancement of the right frontotemporal and clivus dura mater, a soft tissue mass in front of the left ilium with unclear boundary with the iliacus muscle, and a local soft tissue mass in the cervical spine |
| BJ21       | soft tissue masses at T9, left sixth and seventh ribs, left psoas major muscle, pancreatic neck, left pleura, chest wall and back                                                                                                                   |
| BJ22       | left para-rib, thoracic paravertebral soft tissue masses, left pleural effusion in which clonal plasma cells were detected                                                                                                                          |
| BJ23       | a soft tissue mass was found in the right proximal femur                                                                                                                                                                                            |



**2.2 Supplemental Table 2. Baseline characteristics of patients and clinical response after BCMA-BBZ-OX40 CAR-T cell therapy.**

| Patient number | Number of previous therapies | Immunoglobulin subtype | soft tissue plasmacytoma | Extramedullary disease | High risk cytogenetic profile | Triple-class refractory | Previous autologous stem-cell transplantation | ECOG PS | TraditionCART or InstanCART | Total CAR T or T cells infused | CRS     | Neurological toxicity | Best response |
|----------------|------------------------------|------------------------|--------------------------|------------------------|-------------------------------|-------------------------|-----------------------------------------------|---------|-----------------------------|--------------------------------|---------|-----------------------|---------------|
| BJ00           | 4                            | IgA-λ                  | 1                        | 1                      | 1                             | 1                       | 1                                             | 4       | TraditionCART               | 6.6 × 10 <sup>7</sup> (CAR-T)  | Grade 1 | Grade 1               | sCR           |
| BJ01           | 6                            | IgA-κ                  | 1                        | 1                      | 1                             | 0                       | 0                                             | 3       | TraditionCART               | 6.5 × 10 <sup>7</sup> (CAR-T)  | Grade 1 | None                  | VGPR          |
| BJ03           | 3                            | IgG-λ                  | 1                        | 1                      | 0                             | 1                       | 1                                             | 0       | TraditionCART               | 18 × 10 <sup>7</sup> (CAR-T)   | Grade 1 | None                  | PR            |
| BJ04           | 4                            | IgA-λ                  | 1                        | 0                      | 1                             | 1                       | 0                                             | 3       | TraditionCART               | 8.4 × 10 <sup>7</sup> (CAR-T)  | Grade 1 | None                  | CR            |
| BJ05           | 3                            | λ                      | 0                        | 0                      | 0                             | 1                       | 0                                             | 0       | TraditionCART               | 8.3 × 10 <sup>7</sup> (CAR-T)  | Grade 1 | None                  | sCR           |
| BJ06           | 4                            | κ                      | 1                        | 0                      | 1                             | 1                       | 0                                             | 4       | TraditionCART               | 6.0 × 10 <sup>7</sup> (CAR-T)  | Grade 2 | None                  | CR            |
| BJ08           | 5                            | IgA-λ                  | 1                        | 0                      | 0                             | 0                       | 0                                             | 0       | TraditionCART               | 4.8 × 10 <sup>7</sup> (CAR-T)  | None    | None                  | sCR           |
| BJ09           | 3                            | IgA-λ                  | 0                        | 0                      | 1                             | 0                       | 0                                             | 1       | TraditionCART               | 6.8 × 10 <sup>7</sup> (CAR-T)  | Grade 1 | None                  | VGPR          |
| BJ10           | 2                            | λ                      | 0                        | 0                      | 1                             | 1                       | 0                                             | 2       | InstanCART                  | 2.4 × 10 <sup>7</sup> (T)      | Grade 1 | Grade 1               | sCR           |
| BJ11           | 4                            | IgG-λ                  | 1                        | 1                      | 0                             | 1                       | 1                                             | 0       | InstanCART                  | 1.7 × 10 <sup>7</sup> (T)      | Grade 1 | None                  | PR            |
| BJ12           | 5                            | IgG-κ                  | 0                        | 0                      | 1                             | 0                       | 1                                             | 0       | InstanCART                  | 2.3 × 10 <sup>7</sup> (T)      | Grade 1 | None                  | VGPR          |
| BJ13           | 7                            | IgD-λ                  | 1                        | 0                      | 0                             | 1                       | 1                                             | 0       | InstanCART                  | 1.4 × 10 <sup>7</sup> (T)      | Grade 2 | None                  | sCR           |
| BJ14           | 3                            | IgG-κ                  | 1                        | 1                      | 1                             | 1                       | 0                                             | 1       | InstanCART                  | 2.1 × 10 <sup>7</sup> (T)      | Grade 2 | None                  | PR            |
| BJ15           | 3                            | IgA-λ                  | 0                        | 0                      | 0                             | 0                       | 0                                             | 1       | InstanCART                  | 1.8 × 10 <sup>7</sup> (T)      | Grade 1 | None                  | sCR           |
| BJ16           | 2                            | IgA-κ                  | 0                        | 0                      | 0                             | 0                       | 0                                             | 1       | TraditionCART               | 6.4 × 10 <sup>7</sup> (CAR-T)  | Grade 1 | None                  | sCR           |
| BJ17           | 3                            | IgA-λ                  | 1                        | 1                      | 1                             | 1                       | 1                                             | 1       | InstanCART                  | 1.9 × 10 <sup>7</sup> (T)      | Grade 1 | None                  | PR            |
| BJ18           | 3                            | IgG-κ                  | 0                        | 0                      | 1                             | 0                       | 0                                             | 2       | TraditionCART               | 14 × 10 <sup>7</sup> (CAR-T)   | Grade 1 | None                  | sCR           |
| BJ19           | 2                            | IgA-λ                  | 0                        | 0                      | 0                             | 1                       | 0                                             | 1       | TraditionCART               | 16 × 10 <sup>7</sup> (CAR-T)   | Grade 1 | None                  | sCR           |

|      |   |                |   |   |   |   |   |   |               |                              |         |      |     |
|------|---|----------------|---|---|---|---|---|---|---------------|------------------------------|---------|------|-----|
| BJ20 | 3 | IgA- $\lambda$ | 0 | 0 | 0 | 1 | 0 | 1 | TraditionCART | $18 \times 10^7$<br>(CAR-T)  | None    | None | sCR |
| BJ21 | 4 | IgG- $\kappa$  | 1 | 1 | 0 | 1 | 1 | 3 | TraditionCART | $20 \times 10^7$<br>(CAR-T)  | Grade 1 | None | PR  |
| BJ22 | 2 | IgA- $\lambda$ | 1 | 1 | 0 | 1 | 1 | 2 | TraditionCART | $7.9 \times 10^7$<br>(CAR-T) | Grade 1 | None | sCR |
| BJ23 | 7 | $\lambda$      | 1 | 0 | 1 | 1 | 1 | 3 | TraditionCART | $4.1 \times 10^7$<br>(CAR-T) | None    | None | sCR |
